# Supplementary material
Source: publisher figshare collection journal article supplement (https://gsajournals.figshare.com/ndownloader/files/26016644)
Supplement: Supplementary file 1 [file 26016644]

## Sheet: table S4
Table S4. lin-41 GU-SM sequences and MFEs with all let-7-family microRNAs.
Species	GU-SM+SUP sequence(s)	Distance (nt) from stop codon	MFE (kcal/mol) with let-7 microRNA	MFE (kcal/mol) with miR-48	MFE (kcal/mol) with miR-84	MFE (kcal/mol) with miR-241	MFE (kcal/mol) with miR-795	MFE (kcal/mol) with miR-12463
C. zanzibari	CCCCCGUUUUUAUACAACCAUUCUGCCUCU	575	-29	-20	-20.6	-20.4	no mir-795	no mir-12463
C. tribulationis	ACCCCCAAUUUAUACAACCGUUCUGCCUCA	710	-28.7	-16.9	-19	-16.9	no mir-795	no mir-12463
C. sinica	CCCCUUUUUUCAUACAACCAUUCUGCCUCU	774	-27.3	-17.3	-19	-19	no mir-795	no mir-12463
C. nigoni	ACACCCCUUUUAUACAACCAUUCUGCCUCU	521	-29	-16.9	-17.3	-19.7	no mir-795	no mir-12463
C. briggsae	ACACCCCUUUUAUACAACCAUUCUGCCUCU	491	-29	-16.9	-17.3	-19.7	no mir-795	no mir-12463
C. remanei	GACCCCUUUUUAUACAACCAUUCUGCCUCA	817	-29.9	-17.8	-20.3	-17.6	no mir-795	no mir-12463
C. latens	GACCCCUUUUUAUACAACCAUUCUGCCUCA	804	-29.9	-17.8	-20.3	-17.6	no mir-795	no mir-12463
C. wallacei	ACACCCUUUUUAUACAACCGUUCUGCCUCA	896	-31	-18.4	-19.9	-20	no mir-795	no mir-12463
C. tropicalis	ACCCCCAAUUUAUACAACCGUUCUGCCUCA	897	-31	-18.4	-19.9	-20	no mir-795	no mir-12463
C. doughertyi	CCACCCAAUUUAUACAACCAUUCUGCCUCU	646	-29	-17.5	-19	-20.6 & -19.5	no mir-795	no mir-12463
C. brenneri	ACCCCCUUUUUAUACAACCAUUCUGCCUCU	916	-29	-16.9	-21.5	-17.8	no mir-795	no mir-12463
C. inopinata	GCAAACCUCUUAUACAACCGUUCUGCCUCG	851	-30.5	-19.9	-17.8	-19.6	no mir-795	no mir-12463
C. elegans	AAUCCCUUUUUAUACAACCAUUCUGCCUCU	757	-29	-16.9	-20.4	-16.9	-15.8	no mir-12463
C. kamaaina	GCACCCUUUUUAUACAACCAUUCUGCCUCC	764	-28.6	-17.9	-20.3	-16.5	no mir-795	no mir-12463
C. waitukubuli	CCCAACUUUAUAUACAAUCAUUCUGCCUCA	775	No let-7	-19.7	-22.1	-18.4	no mir-795	-21.4
C. panamensis	UUUGUUGACAAAUGAGUCCCGACUGCCUCA	1736	No let-7	-19.9 -22.6, -25.0, -25.8 & -23.6	-25.2	-20.8	no mir-795	-22.5
C. nouraguensis	CCCACAACUUUAUACAACCAUUCUGCCUCA	719	No let-7	-21.3	-21.6 & -23.7	-17.8	no mir-795	-23.3, -23.8 & -20.4
C. becei	CCCACAACUUUAUACAACCACUCUGCCUCA	729	No let-7	-21.3	-20.8	-20.4	no mir-795	-18.8 & -22.1
C. macrosperma	CCCCCAACUUUAUACAACCGUUCUGCCUCA	743	-31	-19.6	-21.8	-20	no mir-795	-21.1
C. sulstoni	GCUCGUUUUUAAAUAUUAUACUCUGCCUCA	655	No let-7	-21	-24.6	-23.1	no mir-795	-21.7
C. afra	CUGUGCAACCCCUUAUUAUACUCUGCCUCA	699	No let-7	-19.6	-23.2	-19.6	no mir-795	-17.9
C. japonica	GUACCAUUUUAUACCCCCAGUUCUGCCUCA	654	No let-7	-22.7	-18.9	-18.6	no mir-795	-24.2
C. uteleia	CCCAAUAUUUUAUACAACCGUUCUGCCUCG	832	-30.6	no mir-48	-22.2	no mir-241	no mir-795	no mir-12463
C. guadeloupensis	UCCGUUUUAUUAUACAACCAUUCUGCCUCU	651	-29.9	no mir-48	-20.7	no mir-241	no mir-795	no mir-12463
C. castelli	CCACCCAUUUUUUACAACCGUUCUGCCUCU	461	-27.1	no mir-48	-20.5	no mir-241	no mir-795	no mir-12463
C. angaria	Unable to identify due to sequence gaps	not available	not available	no mir-48	not available	no mir-241	no mir-795	no mir-12463
C. quiockensis	ACCACCCUUUUUUACAACCGUUCUGCCUCC	431	-26.7	no mir-48	-20.1	no mir-241	no mir-795	no mir-12463
C. vivipara	GAACUUUUUUAUACAACCGUACCUGCCUCA	972	-29.8	no mir-48	-20.3	no mir-241	no mir-795	no mir-12463
C. virilis	AAAAUCCUAGAAUACAACCGUUCUGCCUCG	676	-28.9	no mir-48	-21	no mir-241	no mir-795	no mir-12463
C. plicata	GAAACCCUUUUAUACAACCAUUCUGCCUCA	742	-29.9	no mir-48	-20	no mir-241	no mir-795	no mir-12463
C. bovis	GAACCCAUUGGAUACAACCGUUCUGCCUCG	1004	-29.2	no mir-48	-21	no mir-241	no mir-795	no mir-12463
C. parvicauda	ACCACUCGUAUACAACCACUCUCUGCCUCA	374	-28.3	no mir-48	no mir-84	no mir-241	no mir-795	no mir-12463
	CCACCCUGAUUAUACAACCAUUCUGCCUCU	408	-29.6	no mir-48	no mir-84	no mir-241	no mir-795	no mir-12463
C. monodelphis	CAAAUAUGUCUACAACCGCCACCUGCCUCA	2300	-26.8	no mir-48	-19.9	no mir-241	no mir-795	no mir-12463
List of all lin-41 GU-SM+SUP sequences in all Caenorhabditis species used in this study, the position of the GU-SM relative to the stop codon, and all predicted MFEs (kcal/mol) of each GU-SM+SUP sequence hybridized with each respective let-7-family microRNA. MFEs in bold = lowest energy (most favorable). Outlined in the green box are species recovered in the Elegans group. Outlined in the red box…
